# Supplementary material for: Role of EZH2 in Uterine Gland Development
Source: MDPI journal article supplement (doi:10.3390/ijms232415665), 2022-12-10
Supplement: s1 [file s1]

## Role of EZH2 in Uterine Gland Development

Nan Ni<sup>1</sup>, Frank L. Jalufka<sup>2</sup>, Xin Fang<sup>1</sup>, Dylan A. McCreedy<sup>2,3,4</sup>, Qinglei Li<sup>1,\*</sup>

<sup>1</sup>Department of Veterinary Integrative Biosciences, Texas A&M University, College Station, TX 77843, USA

<sup>2</sup>Department of Biology, Texas A&M University, College Station, TX 77843, USA

<sup>3</sup>Department of Biomedical Engineering, Texas A&M University, College Station, TX 77843, USA

<sup>4</sup>Institute for Neuroscience, Texas A&M University, College Station, TX 77843, USA

\*Corresponding author

### Supplementary Materials

**Figure S1.** Generation of *Ezh2 Amhr2*-Cre cKO mice.

**Figure S2.** Immunohistochemical analysis of uterine development in *Ezh2* conditional knockout mice.

**Figure S3.** Histological analysis of uteri from *Ezh2 Amhr2*-Cre cKO mice.

**Figure S4.** qRT-PCR analysis of uterine gland- and adenogenesis-associated genes using uteri from control and *Ezh2 Amhr2*-Cre cKO mice at PD10.

**Figure S5.** Ovarian histology and function of *Ezh2 Amhr2*-Cre cKO mice.

**Figure S6.** Conditional deletion of *Ezh2* using *Amhr2*-Cre does not cause epithelial stratification.

**Figure S7.** Reduced numbers of PRF1-positive cells in *Ezh2 Amhr2*-Cre cKO mice at E6.5.

**Figure S8.** PAS staining of uNK cells.

**Figure S9.** A graphical summary.

**Table S1.** Differentially expressed genes in the uteri of *Ezh2 Amhr2*-Cre cKO mice versus controls at PD10.

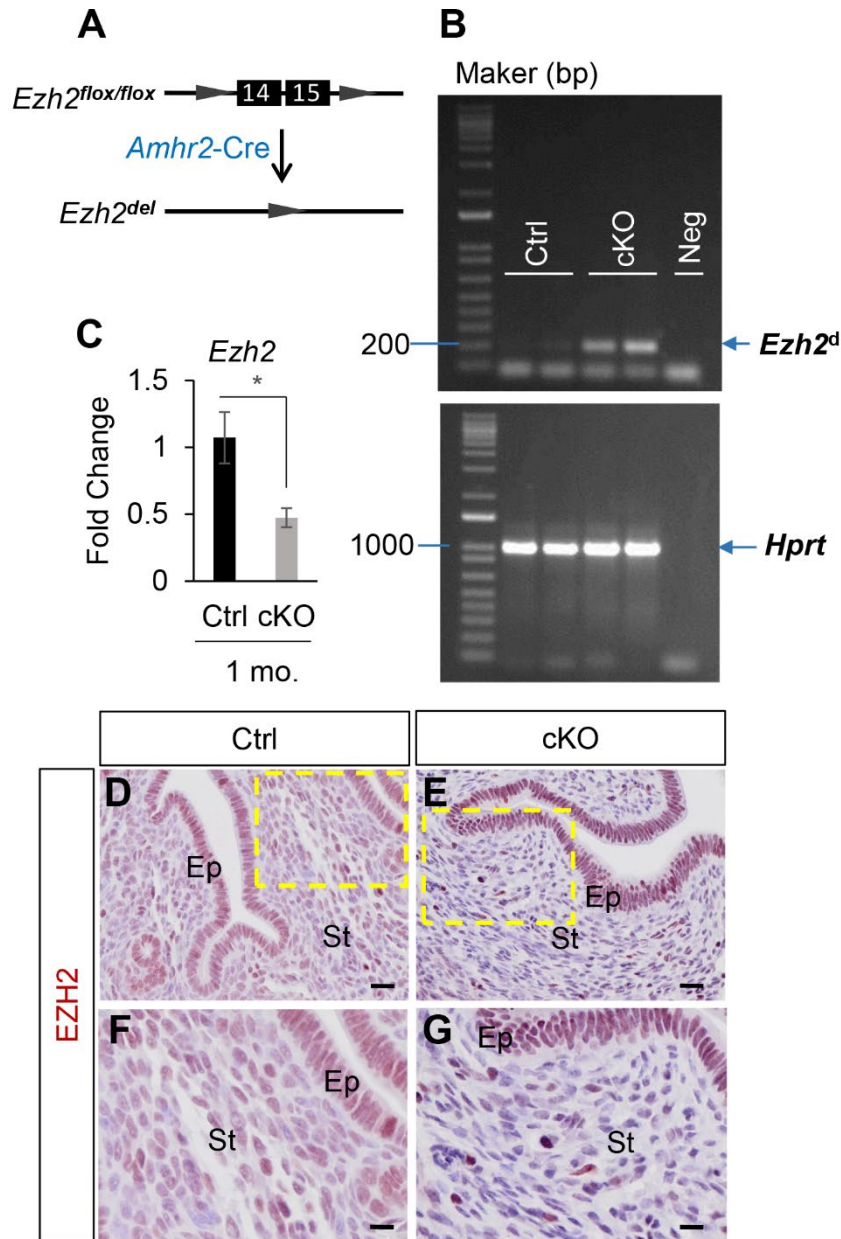

**Figure S1.** Generation of *Ezh2* *Amhr2*-Cre cKO mice. **(A)** Cre-loxP strategy to generate conditional deletion of *Ezh2* using *Amhr2*-Cre. **(B)** Recombination PCR. Note that the recombined band of *Ezh2* was only detectable in the uteri of *Ezh2* *Amhr2*-Cre cKO mice but not controls. Neg, negative control. **(C)** qRT-PCR analysis of *Ezh2* mRNA levels using uteri from 1-month-old control and *Ezh2* *Amhr2*-Cre cKO mice.  $n=5$ . *Rpl19* was included as an internal control. Data are mean  $\pm$  s.e.m,  $*p<0.05$ . **(D-G)** Immunostaining of EZH2 using uteri of 1-month-old control and *Ezh2* *Amhr2*-Cre cKO mice. Panels (F) and (G) are high power images of the boxed regions of panels (D) and (E), respectively. At least three animals for each genotype were examined. St, stroma. Ep, epithelium. Scale bar = 10  $\mu$ m (F and G) and 20  $\mu$ m (D and E).

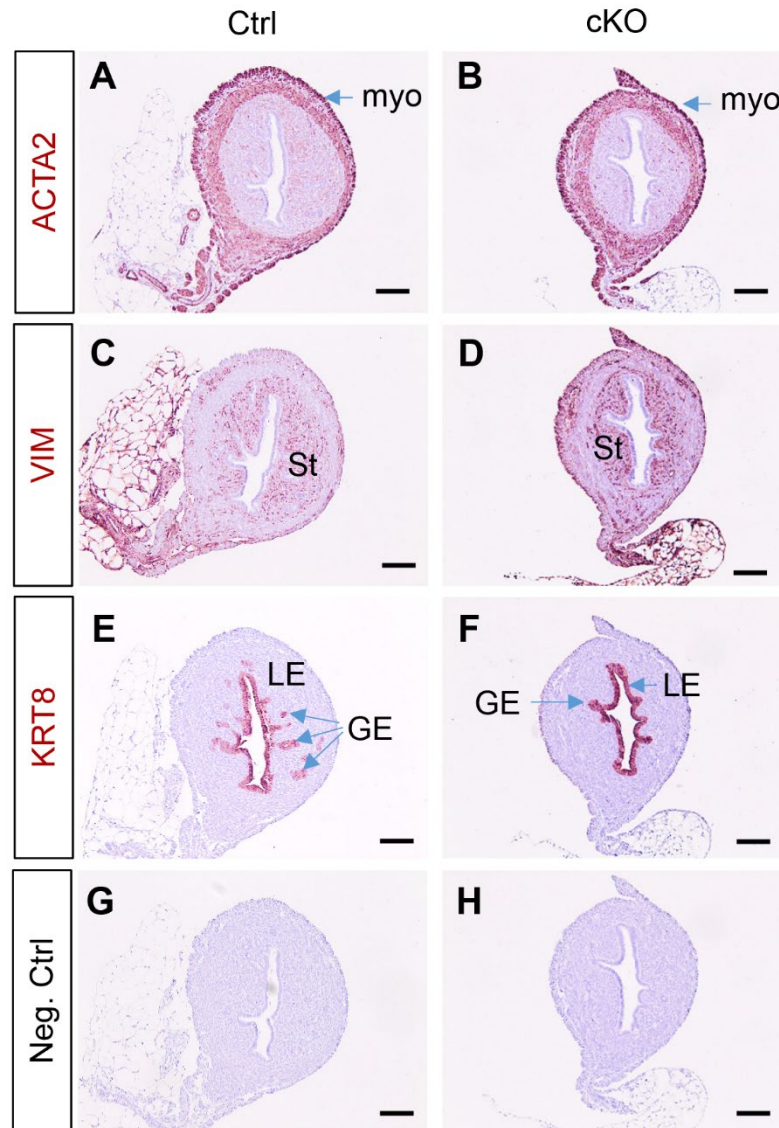

**Figure S2.** Immunohistochemical analysis of uterine development in *Ezh2* conditional knockout mice. (**A-F**) Immunostaining of ACTA2, VIM, KRT8 using uteri from control and *Ezh2 Amhr2-Cre* cKO mice at PD15. At least three animals for each genotype were examined. (**G** and **H**) Negative controls using rabbit IgG. Scale bar=100  $\mu$ m (A-H).

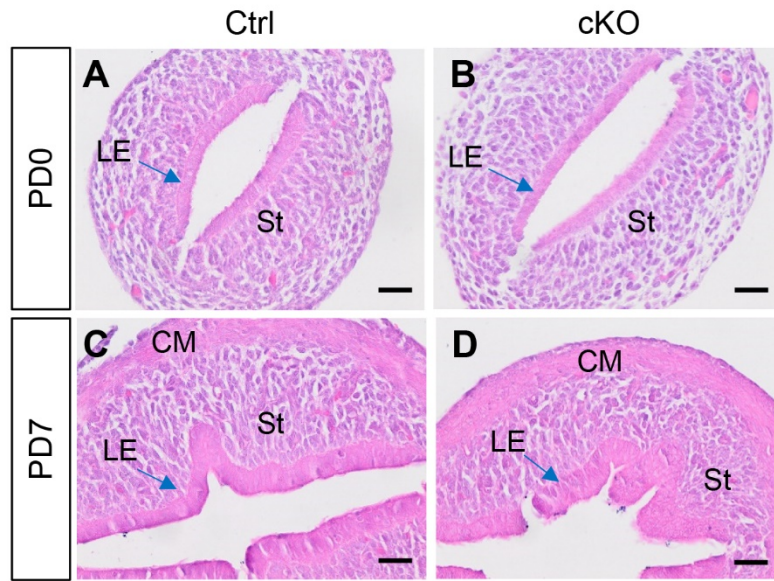

**Figure S3.** Histological analysis of uteri from *Ezh2 Amhr2-Cre* cKO mice. **(A-D)** H.E. staining of uteri from control and *Ezh2 Amhr2-Cre* cKO mice at PD0 and PD7. At least three animals for each genotype were examined. LE, luminal epithelium. St, stroma. CM, circular muscle layer. Scale bar=25  $\mu$ m (A-D).

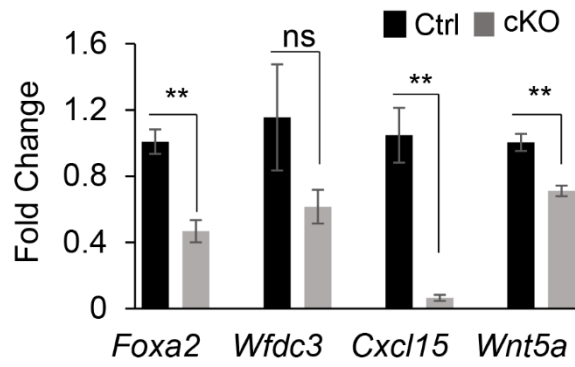

**Figure S4.** qRT-PCR analysis of uterine gland- and adenogenesis-associate genes using uteri from control and *Ezh2 Amhr2*-Cre cKO mice at PD10. n=4. Data are mean  $\pm$  s.e.m, \*\* $p < 0.01$ . ns, not significant.

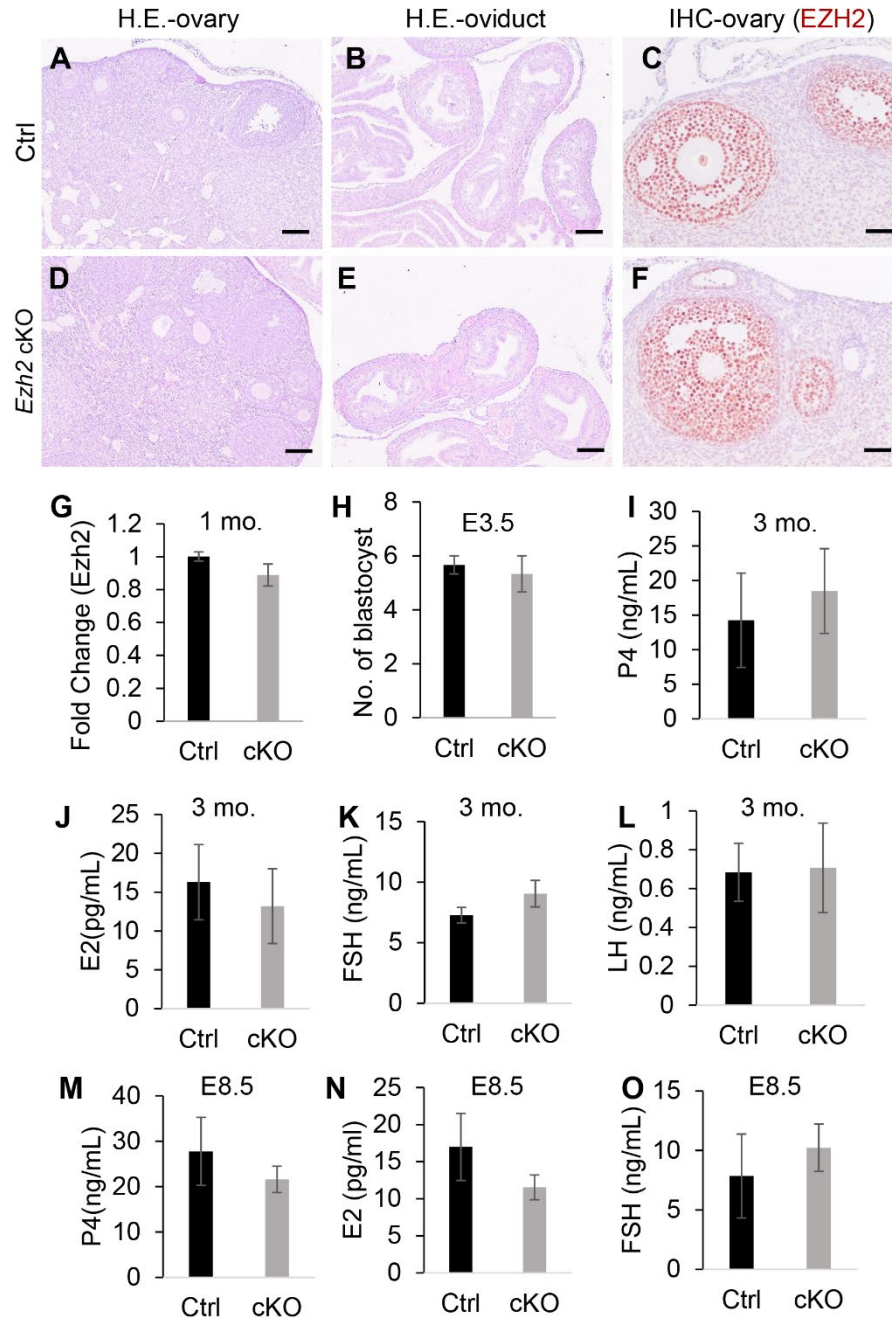

**Figure S5.** Ovarian histology and function of *Ezh2 Amhr2-Cre* cKO mice. (A-F) Histological analysis and EZH2 immunostaining using 2-month-old control and *Ezh2 Amhr2-Cre* cKO mice. IHC, immunohistochemistry. Scale bar=50  $\mu$ m (C and F) and 100  $\mu$ m (A, B, D, and E). At least three animals for each genotype were examined. (G) qRT-PCR analysis of *Ezh2* mRNA levels using ovaries from 1-month-old control and *Ezh2 Amhr2-Cre* cKO mice. n=4. Data are mean  $\pm$  s.e.m, (H) Number of blastocysts recovered from the uteri of control and *Ezh2 Amhr2-Cre* cKO mice at E3.5. n=3. (I-O) Hormone levels in the serum of control and *Ezh2 Amhr2-Cre* cKO mice at 3 months of age and/or E8.5. n=3-5. Data are mean  $\pm$  s.e.m.

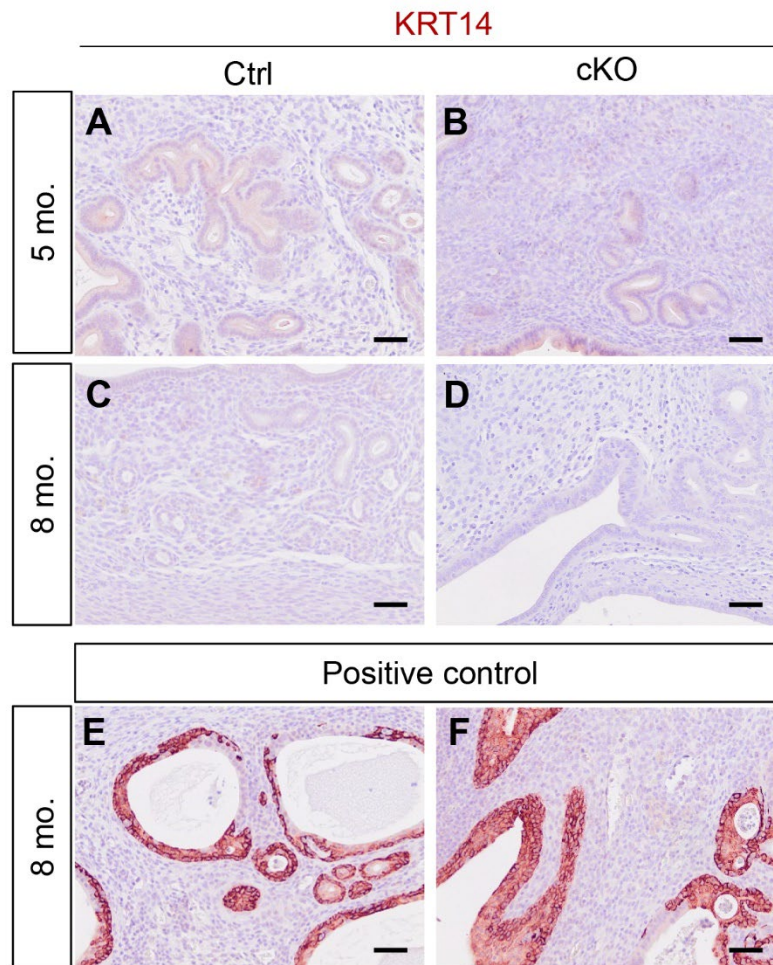

**Figure S6.** Conditional deletion of *Ezh2* using *Amhr2*-Cre does not cause epithelial stratification. **(A-D)** Immunostaining of KRT14 using uteri from control and *Ezh2 Amhr2*-Cre cKO mice at 5 and 8 months of age. At least three animals for each genotype were examined. **(E and F)** Immunostaining of KRT14 using uteri from an 8-month-old *Ezh2 Pgr*-Cre cKO mouse as the positive control. Panels (E) and (F) represent different fields of the cross section. Scale bar=50  $\mu$ m (A-F).

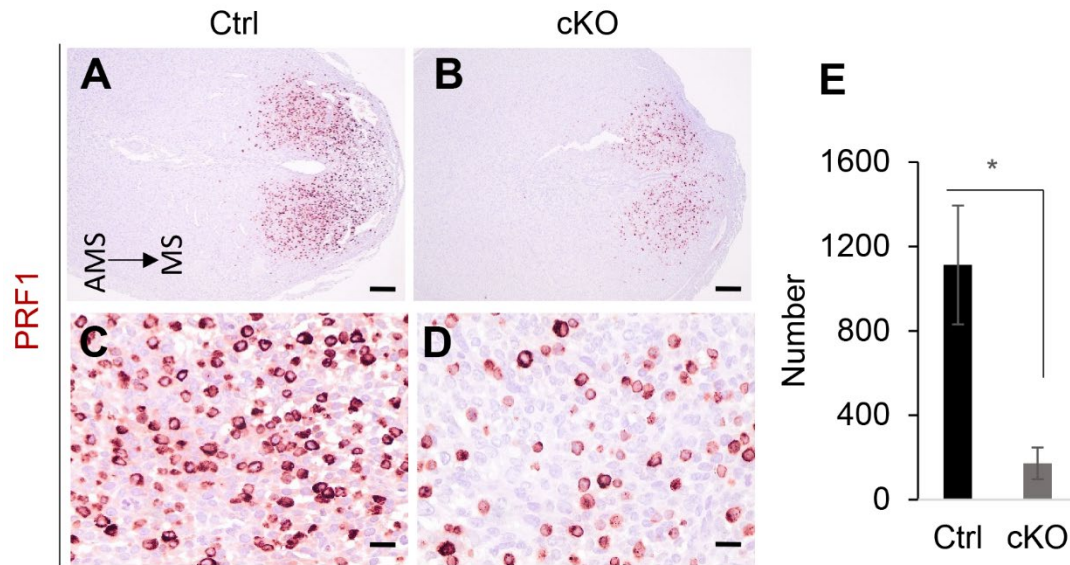

**Figure S7.** Reduced numbers of PRF1-positive cells in *Ezh2 Amhr2-Cre* cKO mice at E6.5. (A-D) Immunostaining of PRF1 using uteri from control and *Ezh2 Amhr2-Cre* cKO mice at E6.5. At least three animals for each genotype were examined. Panels (C) and (D) are higher power images for panels (A) and (B), respectively. MS, mesometrial side. AMS, antimesometrial side. Scale bar = 40  $\mu$ m (C and D) and 200  $\mu$ m (A and B). (E) Qualification of the number of PRF1-positive cells in control and *Ezh2 Amhr2-Cre* cKO mice E6.5. n=3. Data are mean  $\pm$  s.e.m. \* $p$ <0.05.

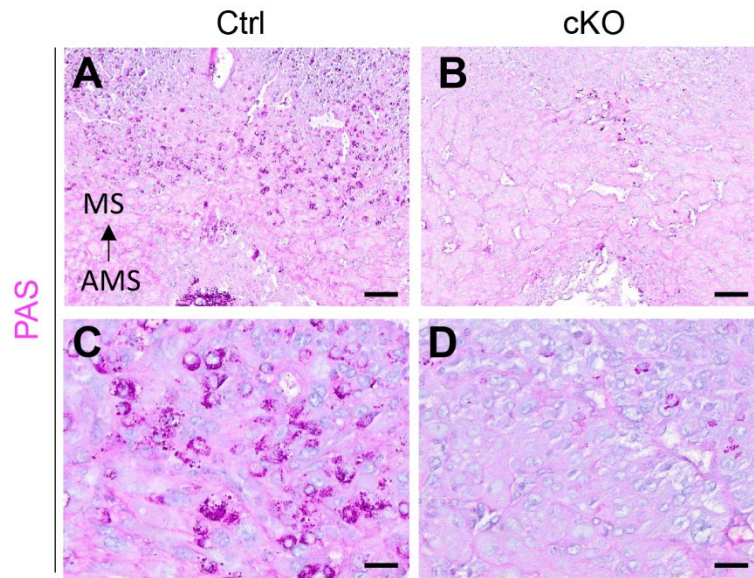

**Figure S8.** PAS staining of uNK cells. **(A-D)** PAS staining using uteri from control and *Ezh2 Amhr2-Cre* cKO mice at E7.5. At least three animals for each genotype were examined. Panels (C) and (D) are higher power images for panels (A) and (B), respectively. MS, mesometrial side. AMS, antimesometrial side. Scale bar = 25  $\mu$ m (C and D) and 100  $\mu$ m (A and B).

*Ezh2*<sup>flox/flox</sup>; *Amhr2*-Cre

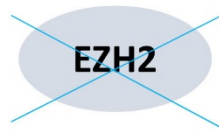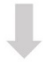

Dysregulation of RA signaling  
others (?)

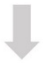

Adenogenesis ↓

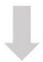

Pregnancy loss

**Figure S9.** A graphical summary.

**Table S1.** Differentially expressed genes in the uteri of *Ezh2 Amhr2*-Cre cKO mice versus controls at PD10

| SYMBOL    | logFC       | logCPM       | F           | PValue      | FDR         |
|-----------|-------------|--------------|-------------|-------------|-------------|
| Myh3      | 4.084410852 | -0.427874733 | 39.21844865 | 4.66E-05    | 0.003882812 |
| a         | 3.635512129 | 1.718317727  | 268.2509477 | 7.01E-10    | 5.84E-06    |
| Fndc3c1   | 3.221869093 | 1.473370855  | 188.4191887 | 5.83E-09    | 1.39E-05    |
| Hoxd13    | 3.207972923 | 0.648094781  | 93.23586383 | 3.44E-07    | 0.000163561 |
| Retnla    | 3.083915501 | -0.077922766 | 27.19447134 | 0.000284309 | 0.013119186 |
| Al606473  | 2.938179223 | -1.609483258 | 26.88133663 | 0.000193008 | 0.010304876 |
| Igf2bp1   | 2.913814703 | 1.649762299  | 194.1149698 | 4.89E-09    | 1.36E-05    |
| Usp44     | 2.600131962 | -1.851882797 | 31.5776308  | 9.31E-05    | 0.006157233 |
| Klb       | 2.585024537 | -0.693712692 | 19.62038265 | 0.00084561  | 0.025564743 |
| Lamp5     | 2.56845684  | -1.72686635  | 32.82708357 | 7.77E-05    | 0.005439137 |
| Mcpt2     | 2.484975273 | -1.008927421 | 29.90045629 | 0.000119616 | 0.007219451 |
| Robo3     | 2.478208061 | -0.609275655 | 56.39265639 | 5.28E-06    | 0.000907092 |
| B3galt2   | 2.430664013 | 0.873026967  | 19.76944299 | 0.001257723 | 0.032132266 |
| Mab21l1   | 2.308422879 | -0.18956687  | 47.11813791 | 1.33E-05    | 0.001666486 |
| Grem1     | 2.293964036 | 1.626688945  | 103.4661058 | 1.91E-07    | 0.000117829 |
| Lhx8      | 2.247975816 | -0.10497445  | 43.0298378  | 2.10E-05    | 0.002314183 |
| Adig      | 2.24617137  | -0.243829732 | 22.60277425 | 0.000453188 | 0.017679655 |
| Gm38427   | 2.224154519 | -1.522346341 | 24.72085654 | 0.000278408 | 0.012942696 |
| Msln1     | 2.151453443 | -1.468734279 | 19.71834222 | 0.000713745 | 0.023060807 |
| Drd1      | 2.145852493 | -1.57453922  | 16.22049717 | 0.001518706 | 0.035736036 |
| Hpca      | 2.133407306 | -1.40305531  | 16.86771914 | 0.001311264 | 0.032857189 |
| Lgals12   | 2.091268328 | 1.059896794  | 40.17098088 | 3.65E-05    | 0.003402877 |
| Eef1a2    | 2.090201167 | -2.037679119 | 16.57948355 | 0.00139929  | 0.034024053 |
| Col6a5    | 1.998901792 | 4.166614552  | 173.7845323 | 2.19E-08    | 3.04E-05    |
| Mir681    | 1.971352205 | -1.687351038 | 17.09518102 | 0.001246322 | 0.032020933 |
| Cpn2      | 1.868255703 | -1.041177408 | 17.15757057 | 0.001229168 | 0.031843673 |
| Abcb11    | 1.858866046 | -1.852649341 | 18.2699279  | 0.000964955 | 0.027628836 |
| Six1      | 1.83066887  | 1.195912414  | 55.55801041 | 5.71E-06    | 0.000960839 |
| Slc26a4   | 1.827434677 | 1.449649411  | 24.12032755 | 0.000488769 | 0.018234704 |
| Lrrtm3    | 1.802212419 | -0.109206567 | 22.68178078 | 0.000401736 | 0.016288031 |
| Actc1     | 1.800742081 | 0.521849137  | 23.76794558 | 0.000368845 | 0.015437753 |
| Pcsk1n    | 1.78537284  | -1.03776586  | 29.37041827 | 0.000129759 | 0.007591245 |
| Acan      | 1.750340054 | -1.026701926 | 16.82654609 | 0.001323435 | 0.033052142 |
| Mc2r      | 1.737534638 | -1.003869959 | 14.55129    | 0.002256225 | 0.045722872 |
| Dhrs9     | 1.735590075 | 1.485109943  | 42.98428098 | 2.23E-05    | 0.002393886 |
| Olig3     | 1.713023459 | -1.519098566 | 14.70434154 | 0.002173447 | 0.044668028 |
| Serpinb11 | 1.695161995 | -0.740943853 | 14.20285325 | 0.002458748 | 0.047675573 |
| Hoxaas3   | 1.691066628 | -1.266690464 | 18.71437328 | 0.000878289 | 0.02583397  |
| Nxph1     | 1.683504492 | -0.06896344  | 17.21501269 | 0.001243655 | 0.032020933 |
| Zfhx4     | 1.660744056 | 3.463497025  | 106.0287615 | 2.12E-07    | 0.000126295 |
| Rbfox3    | 1.658910428 | 0.484732299  | 53.88316894 | 6.70E-06    | 0.001042662 |
| Gm10419   | 1.643767182 | -0.945417653 | 18.70874392 | 0.000879329 | 0.02583397  |
| Adam33    | 1.640938537 | 1.667430799  | 22.819792   | 0.000593095 | 0.020669004 |
| Pparg     | 1.631049242 | 1.280550248  | 16.62062581 | 0.001985105 | 0.041805154 |
| Slc7a10   | 1.60427873  | 1.60686362   | 37.43908404 | 4.54E-05    | 0.003871994 |
| Hoxa2     | 1.595098297 | 0.30059504   | 40.08859214 | 2.98E-05    | 0.002941106 |

|               |             |              |             |             |             |
|---------------|-------------|--------------|-------------|-------------|-------------|
| Tcf24         | 1.587986765 | -1.079851299 | 18.15397506 | 0.000989174 | 0.027855688 |
| Hoxa6         | 1.577288953 | -0.40402004  | 25.77853137 | 0.000232072 | 0.011437441 |
| Hoxa5         | 1.528740501 | 1.669664182  | 51.01253955 | 8.89E-06    | 0.001213622 |
| Zim1          | 1.526558607 | 2.985311993  | 87.16669465 | 5.01E-07    | 0.00021947  |
| Lmx1a         | 1.511384219 | -0.894191856 | 16.474981   | 0.001432888 | 0.034471509 |
| Npb           | 1.504377245 | -1.789588164 | 15.67867195 | 0.001722139 | 0.038714419 |
| Kcnt1         | 1.494570184 | 0.609962614  | 32.95596105 | 7.63E-05    | 0.005412044 |
| Miat          | 1.47615373  | 1.076062967  | 26.70217699 | 0.000201339 | 0.010580142 |
| Agt           | 1.457869475 | 0.150617464  | 20.49138353 | 0.000611183 | 0.020865986 |
| Hoxd12        | 1.455514543 | 0.05630062   | 21.62960954 | 0.000489714 | 0.018234704 |
| Trim63        | 1.45201534  | -0.798496255 | 16.47476404 | 0.001432959 | 0.034471509 |
| Slc36a2       | 1.41923055  | 1.072651409  | 20.16516608 | 0.000730428 | 0.023398982 |
| Klf14         | 1.408124101 | 1.663731792  | 61.73421286 | 3.28E-06    | 0.00067244  |
| Kcnq2         | 1.399025074 | -0.280892787 | 18.1773146  | 0.000984243 | 0.027789008 |
| Slc10a4       | 1.379734475 | 0.589270425  | 29.8268091  | 0.000120969 | 0.00727474  |
| Nr2f1         | 1.376430191 | 2.344575809  | 57.34523233 | 4.84E-06    | 0.000857342 |
| Cxcl5         | 1.375344868 | 1.596620373  | 46.47687102 | 1.43E-05    | 0.001712704 |
| Crabp1        | 1.359758319 | 5.914118978  | 24.92811448 | 0.001339754 | 0.033063151 |
| Adrb3         | 1.337126507 | 0.938430176  | 44.39414861 | 1.80E-05    | 0.00203957  |
| Hoxa3         | 1.336611544 | 2.358705125  | 107.1074286 | 1.57E-07    | 0.000104546 |
| Il1r2         | 1.33224522  | 0.847644027  | 44.47480297 | 1.78E-05    | 0.00203957  |
| Synpo2l       | 1.319497595 | -0.517361165 | 16.59695241 | 0.001393763 | 0.034024053 |
| Foxp2         | 1.310147178 | 3.285489006  | 139.0786465 | 3.48E-08    | 4.15E-05    |
| Aldh3b2       | 1.305548604 | 0.310565715  | 20.71970133 | 0.00058424  | 0.020403082 |
| Cdkn2a        | 1.298415159 | -1.156004067 | 14.09981262 | 0.002522641 | 0.048414116 |
| Hoxc9         | 1.287095979 | -0.449808547 | 15.30159333 | 0.001882494 | 0.040766201 |
| 1700028K03Rik | 1.286930423 | -0.755119505 | 14.99728757 | 0.002024658 | 0.042286147 |
| Foxd3         | 1.272844947 | -1.13129635  | 15.49759547 | 0.001797072 | 0.040014646 |
| Hoxc10        | 1.255826724 | 2.378920136  | 72.27059039 | 1.40E-06    | 0.000377374 |
| Acvr1c        | 1.247551358 | 1.577235755  | 30.85594714 | 0.000103564 | 0.006528579 |
| Erich3        | 1.239454415 | 1.864865318  | 44.09874819 | 1.86E-05    | 0.002080563 |
| Cyp46a1       | 1.226659604 | 1.468139817  | 25.48266294 | 0.000244066 | 0.011922721 |
| Hoxc5         | 1.210879268 | -0.097190035 | 17.65067653 | 0.001102832 | 0.029678468 |
| Bhlhe22       | 1.208293737 | 1.670713661  | 55.34978202 | 5.82E-06    | 0.000970062 |
| Mug1          | 1.206507179 | 0.806371361  | 23.22064301 | 0.00036386  | 0.015267437 |
| Crif1         | 1.179301189 | -0.193780913 | 16.51981417 | 0.001418361 | 0.034291799 |
| Nnmt          | 1.176702571 | 0.892876507  | 18.474771   | 0.000923832 | 0.02667105  |
| Catsperz      | 1.175816693 | -0.150478203 | 18.0397517  | 0.001013725 | 0.027961086 |
| Alx1          | 1.172814445 | 0.396964192  | 18.02003294 | 0.001018035 | 0.028030452 |
| Susd5         | 1.152757195 | 0.502034761  | 22.0770532  | 0.000449815 | 0.017679655 |
| A930013F10Rik | 1.130967334 | 0.528306728  | 15.58443775 | 0.001760672 | 0.039421057 |
| A830082K12Rik | 1.128296468 | 0.907637305  | 33.0533223  | 7.53E-05    | 0.005412044 |
| Cyp2f2        | 1.12352477  | 0.964916889  | 17.03378325 | 0.001263476 | 0.032181922 |
| Arhgap40      | 1.116407865 | 1.589541622  | 17.71306973 | 0.001165154 | 0.030808143 |
| Lmo3          | 1.109499758 | 2.290502529  | 52.40487484 | 7.74E-06    | 0.001120565 |
| Prkcg         | 1.107199479 | 1.649252292  | 31.76779678 | 9.05E-05    | 0.00605652  |
| Fabp7         | 1.086182875 | 0.472924614  | 16.80938828 | 0.001328546 | 0.033063151 |

|               |              |              |             |             |             |
|---------------|--------------|--------------|-------------|-------------|-------------|
| Malat1        | 1.086081352  | 7.13007477   | 29.77603595 | 0.000522654 | 0.018968115 |
| Hsf4          | 1.081256485  | -0.258114579 | 14.19309263 | 0.002464719 | 0.047685589 |
| Dlk1          | 1.076097163  | 7.719685347  | 129.6551896 | 8.02E-08    | 6.68E-05    |
| Espn          | 1.070074729  | 2.635930989  | 56.42787404 | 5.26E-06    | 0.000907092 |
| Tg            | 1.055451861  | 0.25003016   | 14.97828545 | 0.002033942 | 0.042404771 |
| Cd300lg       | 1.053284272  | 2.244205905  | 35.18096466 | 5.61E-05    | 0.004363858 |
| Zfp750        | 1.052161385  | 1.662047191  | 20.20617451 | 0.000646892 | 0.021527924 |
| Gdf5          | 1.047979199  | 2.154390489  | 28.53300041 | 0.00014789  | 0.008507554 |
| Arpp21        | 1.046749697  | 0.859573989  | 18.22352068 | 0.000974564 | 0.027703567 |
| Prlr          | 1.04082467   | 3.786818187  | 30.42432772 | 0.000189635 | 0.010190153 |
| Shisa6        | 1.029657278  | -0.063341031 | 14.4386344  | 0.002319504 | 0.046654942 |
| Lrrc29        | 1.025574388  | 1.292529406  | 19.22239919 | 0.00079008  | 0.024561816 |
| Cdh19         | 1.024549402  | 0.162474637  | 14.42304404 | 0.002328422 | 0.046654942 |
| Slc14a1       | 1.009006777  | 6.798662331  | 59.34565639 | 1.39E-05    | 0.001705991 |
| Pcolce2       | 1.001722915  | 2.543503252  | 62.67361038 | 3.02E-06    | 0.000652565 |
| Frmpd2        | -1.002788987 | 0.348043571  | 19.68564319 | 0.000718506 | 0.023150629 |
| Gimap3        | -1.014451208 | 0.831996065  | 15.10249232 | 0.001974141 | 0.04170645  |
| D430041D05Rik | -1.016426817 | 3.09905427   | 70.44052912 | 1.61E-06    | 0.000407456 |
| Nxn12         | -1.019152958 | 0.725126437  | 23.43730449 | 0.000349811 | 0.014925536 |
| P2ry14        | -1.023622828 | 1.749203882  | 21.45598467 | 0.000506292 | 0.01849519  |
| Ptch1         | -1.025648403 | 5.722741655  | 91.35604329 | 7.02E-07    | 0.000248971 |
| Prkg2         | -1.043349066 | 2.285342669  | 56.90626873 | 5.04E-06    | 0.000883219 |
| Scube1        | -1.049902297 | 5.906390153  | 203.2672963 | 3.71E-09    | 1.36E-05    |
| D630033O11Rik | -1.055439771 | 1.042474032  | 21.94853018 | 0.000460876 | 0.017854117 |
| Bdkrb2        | -1.059965173 | 2.789545547  | 61.97550043 | 3.21E-06    | 0.00067244  |
| Ndp           | -1.077717677 | 4.922405691  | 124.6371759 | 6.58E-08    | 6.28E-05    |
| Cd83          | -1.082588811 | 5.368503574  | 124.3523251 | 7.16E-08    | 6.28E-05    |
| Atp6v0d2      | -1.089979883 | 0.281021482  | 21.12122797 | 0.00054013  | 0.01939114  |
| Aff2          | -1.151951985 | 3.321028332  | 61.67891506 | 3.29E-06    | 0.00067244  |
| Inmt          | -1.168512289 | 0.501841812  | 13.90685506 | 0.00264756  | 0.049609736 |
| Ptpro         | -1.174509366 | 2.835639468  | 72.5597303  | 1.37E-06    | 0.000377374 |
| Ascl2         | -1.175063759 | -0.822378795 | 14.26132188 | 0.002423332 | 0.047103693 |
| Gna14         | -1.183426114 | 3.831887731  | 128.3454828 | 5.55E-08    | 5.86E-05    |
| Fam189a1      | -1.188296741 | 0.520205239  | 35.31486495 | 5.51E-05    | 0.004346625 |
| Slc5a11       | -1.189428686 | 2.648166647  | 33.44734066 | 8.30E-05    | 0.005763215 |
| Pthlh         | -1.194153217 | 2.489191118  | 37.2390578  | 4.34E-05    | 0.003828223 |
| Plac8         | -1.204271809 | 6.248509674  | 119.4905667 | 2.47E-07    | 0.000128768 |
| Gstm6         | -1.231701147 | -0.105526973 | 15.48229354 | 0.001803577 | 0.040027892 |
| Batf3         | -1.231728204 | -0.493278306 | 18.84236872 | 0.000855031 | 0.025709592 |
| Plcxd3        | -1.232770939 | -0.754459866 | 15.80018527 | 0.00167389  | 0.038075032 |
| F830016B08Rik | -1.247205018 | 1.308577019  | 24.03609764 | 0.000314141 | 0.013954583 |
| Cd226         | -1.256709438 | -0.680467277 | 21.04239549 | 0.000548477 | 0.019564287 |
| Stra6         | -1.268145913 | 6.005993393  | 138.3644109 | 8.86E-08    | 7.03E-05    |
| Agtr1b        | -1.285993879 | -0.152446235 | 22.4697588  | 0.00041788  | 0.016773616 |
| Klrb1c        | -1.289996239 | 0.519124724  | 22.44233241 | 0.000420023 | 0.016819103 |
| Synpr         | -1.290543515 | 1.171452504  | 19.25391632 | 0.00083691  | 0.025401552 |
| Eda2r         | -1.2912698   | 5.043635041  | 63.42140712 | 1.10E-05    | 0.00143634  |

|          |              |              |             |             |             |
|----------|--------------|--------------|-------------|-------------|-------------|
| Pld5     | -1.299710358 | 2.193405959  | 38.73474728 | 3.55E-05    | 0.003341083 |
| Clic6    | -1.303642585 | 1.883426528  | 17.91687966 | 0.001399842 | 0.034024053 |
| S100g    | -1.308805389 | 3.028035845  | 28.92713651 | 0.00024329  | 0.011919778 |
| Aldh1a1  | -1.33287065  | 6.330749785  | 25.93339481 | 0.001192234 | 0.031177762 |
| Ptch2    | -1.334022092 | 3.276116676  | 78.7201407  | 8.80E-07    | 0.000297803 |
| Bhmt2    | -1.365938727 | 0.491714954  | 28.70983963 | 0.000143828 | 0.008344617 |
| F5       | -1.425607242 | 2.333353137  | 55.06914699 | 5.98E-06    | 0.000974358 |
| Sult1c2  | -1.431110435 | -0.575734115 | 15.27680299 | 0.001893631 | 0.040858815 |
| Stap1    | -1.438952366 | -1.299251191 | 16.55487468 | 0.001407119 | 0.034119044 |
| Gli1     | -1.440724317 | 5.775706456  | 93.67196642 | 2.04E-06    | 0.000492723 |
| Edil3    | -1.441983918 | 3.08137912   | 64.73517743 | 3.06E-06    | 0.000652565 |
| Cited1   | -1.45794662  | 0.266504901  | 31.87125023 | 8.92E-05    | 0.006007193 |
| Ankfn1   | -1.490638657 | 1.54753146   | 57.35317538 | 4.83E-06    | 0.000857342 |
| Hhip     | -1.499833442 | 0.331464964  | 19.48827621 | 0.000748038 | 0.023734901 |
| Rdh9     | -1.511188225 | 0.428186557  | 39.199129   | 3.33E-05    | 0.003187791 |
| Aldh1a3  | -1.522437514 | 6.108281606  | 59.46339979 | 4.00E-05    | 0.003609554 |
| Nog      | -1.541802583 | 2.400392455  | 97.71164423 | 2.64E-07    | 0.000131227 |
| Has2     | -1.562528685 | 3.518302795  | 195.0757447 | 4.74E-09    | 1.36E-05    |
| Npl      | -1.572574153 | 4.2475159    | 46.95064181 | 5.84E-05    | 0.004485011 |
| Gm4951   | -1.596102767 | 2.266486756  | 26.8795162  | 0.000341367 | 0.01479002  |
| Stra6l   | -1.609447431 | 0.071846539  | 36.46510377 | 4.72E-05    | 0.003914916 |
| Slc38a5  | -1.660174449 | 0.629180336  | 46.47641779 | 1.43E-05    | 0.001712704 |
| Gzmb     | -1.681795762 | 0.539474573  | 33.58802935 | 6.98E-05    | 0.005145673 |
| Ms4a4b   | -1.728307134 | 0.367634143  | 27.2764851  | 0.000180908 | 0.00984825  |
| Klrd1    | -1.73866696  | -0.213785153 | 17.86343835 | 0.001056081 | 0.028651786 |
| Prokr2   | -1.740829715 | -0.120920068 | 25.01041917 | 0.000264733 | 0.012584073 |
| Kcnmb2   | -1.741844794 | -0.085512252 | 27.40125088 | 0.000177272 | 0.009711033 |
| Atp7b    | -1.752503617 | -0.368963801 | 22.74103594 | 0.000397354 | 0.016223357 |
| Il2rb    | -1.803463961 | 2.102967331  | 58.05443139 | 5.36E-06    | 0.000911017 |
| Bpi      | -1.805580524 | -0.983187344 | 18.95095811 | 0.000835859 | 0.025401552 |
| Gvin1    | -1.821141883 | -1.051827269 | 19.86179179 | 0.000693287 | 0.02265019  |
| Qrfprl   | -1.843098071 | -0.719574213 | 30.70268956 | 0.000105962 | 0.00661092  |
| BC048679 | -1.879999472 | 2.688640393  | 38.79286054 | 8.70E-05    | 0.005919259 |
| Ano2     | -1.902885643 | 3.149007444  | 48.23876237 | 3.84E-05    | 0.003534893 |
| Gm7030   | -1.931123685 | -1.832500594 | 17.46435831 | 0.001148707 | 0.030466996 |
| Gstm7    | -1.971651343 | 6.691106105  | 98.92732923 | 6.14E-06    | 0.000974358 |
| Ccl5     | -1.972288721 | -0.089327525 | 15.98500309 | 0.001876903 | 0.040763297 |
| Rdh1     | -1.992093605 | 0.375345583  | 72.52483196 | 1.38E-06    | 0.000377374 |
| Samd3    | -2.018766751 | -1.670119467 | 17.34787923 | 0.001178513 | 0.030979309 |
| Abca13   | -2.104929116 | -0.970674928 | 31.57314589 | 9.31E-05    | 0.006157233 |
| Nkg7     | -2.136853172 | -0.17716162  | 21.91873093 | 0.000504783 | 0.01849519  |
| Ms4a8a   | -2.18955936  | -1.210028011 | 16.86628994 | 0.001311684 | 0.032857189 |
| Klre1    | -2.192376636 | -1.118142722 | 21.88395577 | 0.000466552 | 0.017935549 |
| Klrk1    | -2.203569944 | 0.022472164  | 29.48487078 | 0.000130356 | 0.007592553 |
| Cyp26a1  | -2.22979281  | 0.19154395   | 45.95729093 | 1.51E-05    | 0.001786927 |
| Klra5    | -2.275046633 | -1.30091467  | 24.82375767 | 0.000273456 | 0.012795609 |
| Ncr1     | -2.293093611 | 0.110211801  | 42.72024116 | 2.18E-05    | 0.002364173 |

|         |              |              |             |             |             |
|---------|--------------|--------------|-------------|-------------|-------------|
| Coch    | -2.299938169 | 6.103723609  | 79.0958763  | 2.75E-05    | 0.002797228 |
| Gzma    | -2.32008009  | 0.683788845  | 58.46030516 | 4.37E-06    | 0.00080031  |
| Trpm1   | -2.343067422 | 0.207030477  | 44.45001142 | 1.79E-05    | 0.00203957  |
| Smim41  | -2.354540108 | 2.887253676  | 106.4405664 | 3.57E-07    | 0.000164989 |
| Gzmc    | -2.388036049 | -0.683589135 | 33.38560202 | 7.18E-05    | 0.005246221 |
| Cadps   | -2.502804335 | 1.416990984  | 97.46022421 | 2.68E-07    | 0.000131227 |
| Sp5     | -2.516032224 | -0.068165613 | 53.35411232 | 7.05E-06    | 0.001069785 |
| Xcl1    | -2.555412554 | -0.289460003 | 44.28513519 | 1.82E-05    | 0.002050881 |
| Dio1    | -2.591765911 | -1.943698217 | 26.1021351  | 0.000219729 | 0.011157852 |
| Cldn2   | -2.679846927 | -1.329872296 | 36.42490251 | 4.75E-05    | 0.003916198 |
| Fbxo40  | -2.714978259 | -1.855957234 | 21.58424806 | 0.000493983 | 0.018245612 |
| Vit     | -2.715141565 | 1.998963481  | 82.57356055 | 1.37E-06    | 0.000377374 |
| Klrc1   | -2.828166028 | -1.61430031  | 32.27665826 | 8.41E-05    | 0.005788268 |
| Foxa2   | -2.909124916 | 0.294640541  | 85.27126162 | 5.66E-07    | 0.000241349 |
| Cd7     | -3.017963527 | 0.035629545  | 103.6311167 | 1.89E-07    | 0.000117829 |
| Egfm1   | -3.061983705 | -0.711591653 | 60.00241951 | 3.81E-06    | 0.000729619 |
| Galnt14 | -3.121886752 | -0.099994265 | 99.77205142 | 2.35E-07    | 0.000128768 |
| A2ml1   | -3.34692731  | 0.471652645  | 80.44544447 | 7.81E-07    | 0.000271047 |
| Dleu7   | -3.454030353 | 0.874509025  | 144.9651555 | 2.74E-08    | 3.51E-05    |
| Wif1    | -3.475555745 | -0.602618152 | 52.54467667 | 7.63E-06    | 0.00111493  |
| Ihh     | -3.576625584 | 1.276366075  | 112.0614704 | 1.55E-07    | 0.000104546 |
| Nos1    | -3.69665738  | -0.179638815 | 77.96630628 | 9.28E-07    | 0.000303064 |
| Cxcl15  | -3.832444558 | 1.206883406  | 83.50519308 | 1.46E-06    | 0.000385114 |
| Itgbl1  | -3.970853653 | -0.043575635 | 78.49754462 | 8.94E-07    | 0.000297803 |
| Nalcn   | -4.52823801  | 1.597071405  | 288.3337011 | 4.52E-10    | 5.84E-06    |
